# Supplementary material for: Pre-monsoon aerosol characteristics over the Indo-Gangetic Basin: implications to climatic impact
Source: Copernicus journal article supplement (doi:10.5194/angeo-29-789-2011), 2011-05-11
Supplement: Supplementary file 1 [file angeo-29-789-2011-supplement.pdf]

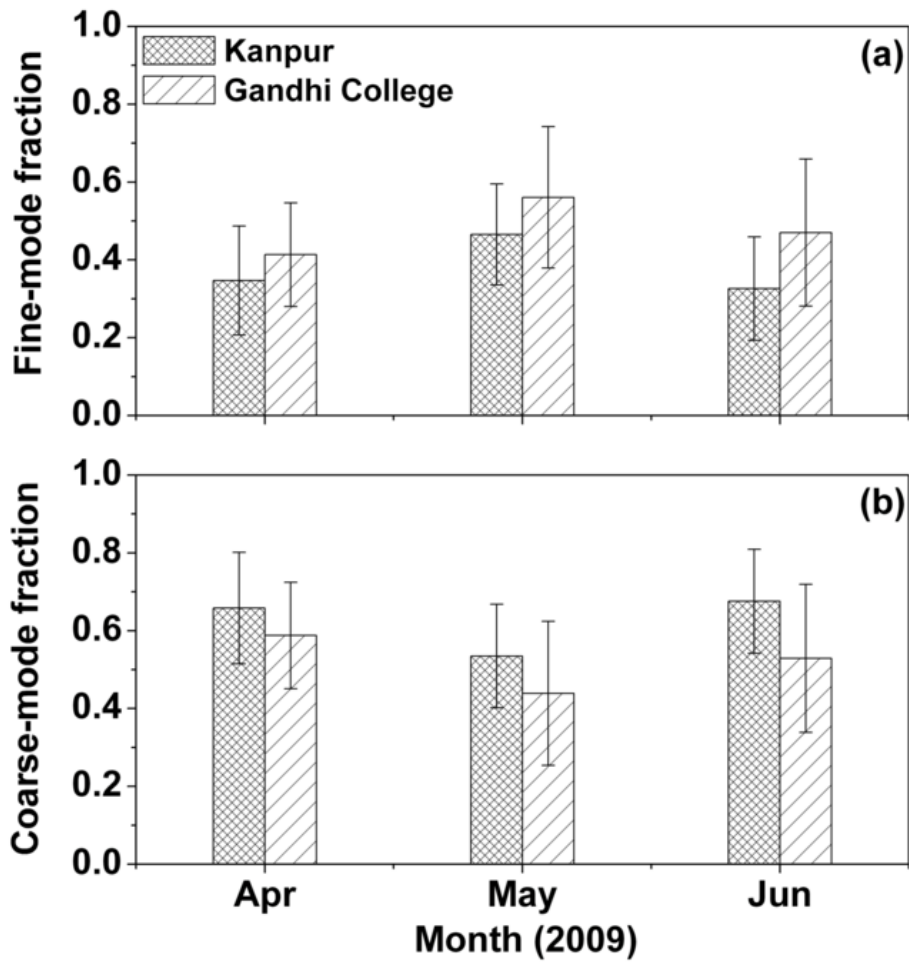

1

2 **Auxiliary Figure:** Monthly mean fraction of (a) fine-mode and (b) coarse-mode aerosols at Kanpur  
 3 and Gandhi College during April to June 2009. The vertical bars at each histogram indicate standard  
 4 deviation (SD) from their mean.
